# Supplementary material
Source: PubMed Central journal article supplement (PMC4793840)
Supplement: krua019774.ww1_default.pdf [file krua019774.ww1_default.pdf]

## Supplementary tables and figures

**Supplementary Table A. Overview of outcome measures**

| Outcomes                                                                    | Range    | MCID              |
|-----------------------------------------------------------------------------|----------|-------------------|
| CCQ (health-related quality of life)                                        | 0-6      | -0.4 <sup>1</sup> |
| SGRQ (health-related quality of life)                                       | 0-100    | -4 <sup>2</sup>   |
| EQ-5D (generic quality of life)                                             | -0,329-1 | -                 |
| SF-36 (generic quality of life)                                             | 0-100    | -                 |
| MRC-Dyspnoea scale                                                          | 0-5      | 1 <sup>3</sup>    |
| SMAS-30 (self-management)                                                   | 0-100    | -                 |
| IPAQ (daily activities)                                                     | -        | -                 |
| PACIC (level of care integrated according to patients)                      | 1-5      | -                 |
| Smoking behavior (proportion of current smokers)                            | 0-100    | -                 |
| Health care usage (hospitalisation days, moderate and severe exacerbations) | -        | -                 |

MCID: minimum clinically relevant difference; CCQ: Clinical COPD Questionnaire; EQ-5D: EuroQol-5D (we used the Dutch value set); IPAQ: International Physical Activity Questionnaire; MRC: Medical Research Council scale; PACIC: Patient Assessment Chronic Illness Care; SF-36: ShortForm-36; SGRQ: Saint Georges Respiratory Questionnaire; SMAS-30: Self Management Scale-30 .

1. Kocks JW, Tuinenga MG, Uil SM, van den Berg JW, Stahl E, van der Molen T. Health status measurement in COPD: the minimal clinically important difference of the clinical COPD questionnaire. *Respir Res* 2006;7:62.
2. Jones PW. St. George's Respiratory Questionnaire: MCID. *COPD* 2005 Mar;2(1):75-9.
3. De Torres JP, Pinto-Plata V, Ingenito E, Bagley P et al. Power of outcome measurements to detect clinically significant changes in pulmonary rehabilitation of patients with COPD. *Chest* 2002; 121: 1092-1098.

**Supplementary table B. Overview of characteristics of included general practices**

|                                     | Intervention (n=20) | Usual care (n=20) | p-value |
|-------------------------------------|---------------------|-------------------|---------|
| <b>General practices</b>            |                     |                   |         |
| Type of practice, n (%)             |                     |                   |         |
| Single-handed, n (%)                | 8 (40)              | 9 (45)            | 0.75    |
| One or more partner practice, n (%) | 9 (45)              | 8 (40)            | 0.75    |
| Health care center, n (%)           | 3 (15)              | 3 (15)            | 1.00    |
| Practice location, urban (%)        | 70                  | 70                | 1.00    |
| Patient practice population, n (SD) | 3401 (1583)         | 3644 (3243)       | 0.50    |
| Ethnic minorities (%)               | 16.0                | 16.1              | 0.98    |
| <b>General practitioners</b>        |                     |                   |         |
| Gender GP, % male                   | 68.5                | 54.8              | 0.32    |
| Age GP, years (SD)                  | 47.4 (8.3)          | 52.3 (8.0)        | 0.79    |
| Years practicing, years (SD)        | 13.4 (7.2)          | 19.2 (7.9)        | 0.85    |

**Supplementary Table C. Subgroup analyses: difference between intervention and control groups in change from baseline to 12 months follow-up in the CCQ score for subgroups.**

|                               | Intervention |             | Usual care |             | Subgroup by treatment interaction |         |         |
|-------------------------------|--------------|-------------|------------|-------------|-----------------------------------|---------|---------|
|                               | N            | Mean (SE)   | N          | Mean (SE)   | $\Delta$ Intervention - UC        | p-value | p-value |
| <b>Full cohort</b>            | 554          | 0.02 (0.03) | 532        | 0.03 (0.03) | -0.01 (0.04)                      | 0.82    |         |
| <b>Smoking status</b>         |              |             |            |             |                                   |         | 0.23    |
| Current smoker                | 179          | 0.23 (0.07) | 196        | 0.18 (0.06) | 0.06 (0.06)                       | 0.30    |         |
| Former/no smoker              | 336          | 0 (0.04)    | 310        | 0.01 (0.03) | 0 (0.05)                          | 0.90    |         |
| <b>Social economic status</b> |              |             |            |             |                                   |         | 0.26    |
| Low SES                       | 195          | 0.19 (0.06) | 204        | 0.25 (0.06) | -0.06 (0.05)                      | 0.23    |         |
| Middle/high SES               | 303          | 0.07 (0.04) | 287        | 0.01 (0.03) | 0.06 (0.06)                       | 0.28    |         |
| <b>Comorbidities</b>          |              |             |            |             |                                   |         | 1.0     |
| $\leq 2$ comorbidities        | 199          | 0.04 (0.04) | 179        | 0.01 (0.03) | 0.03 (0.05)                       | 0.54    |         |
| $>2$ comorbidities            | 323          | 0.23 (0.06) | 336        | 0.25 (0.06) | -0.02 (0.05)                      | 0.66    |         |
| <b>Physical activity</b>      |              |             |            |             |                                   |         | 0.51    |
| Low IPAQ score                | 487          | 0.28 (0.08) | 453        | 0.29 (0.08) | 0 (0.05)                          | 0.95    |         |
| Middle/high IPAQ              | 54           | 0 (0.08)    | 70         | 0.03 (0.03) | -0.02 (0.09)                      | 0.78    |         |
| <b>Exacerbations</b>          |              |             |            |             |                                   |         |         |
| $<2$ exacerbations            | 505          | 0.03 (0.03) | 490        | 0.03 (0.03) | 0 (0.04)                          | 0.90    | 0.56    |
| $\geq 2$ exacerbations        | 49           | 0.58 (0.12) | 42         | 0.63 (0.09) | -0.05 (0.09)                      | 0.59    |         |

Values are means (SE), unless stated otherwise. Lower CCQ score means better quality of life. Values are corrected for clustering, age, sex, score at baseline and MRC  $>2$ .

Supplementary figure A.

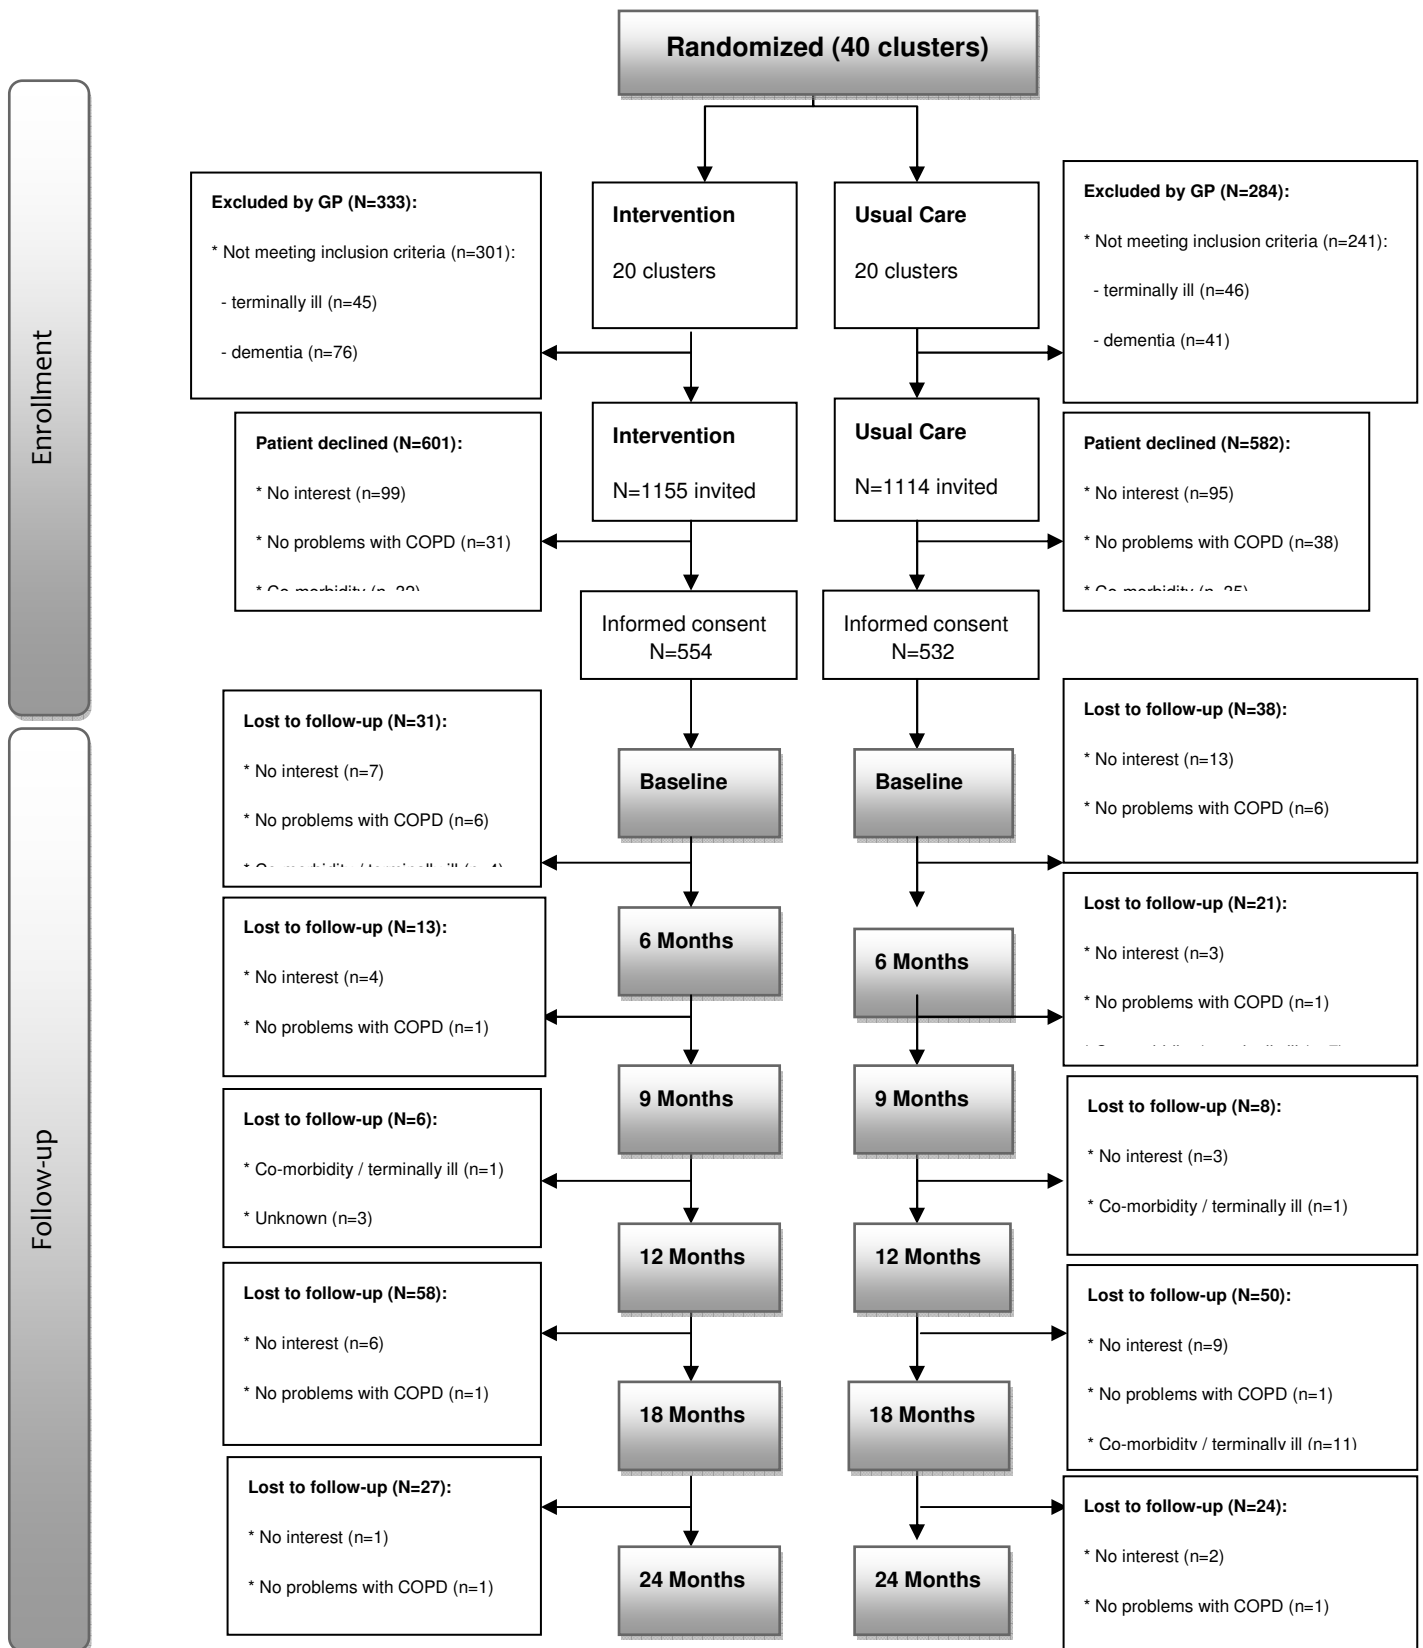

Flow diagram of RECODE study.
